# Supplementary material for: A Highly Conserved Peptide Vaccine Candidate Activates Both Humoral and Cellular Immunity Against SARS-CoV-2 Variant Strains
Source: PubMed Central journal article supplement (PMC8688401; doi:10.3389/fimmu.2021.789905), 2021-12-07
Supplement: Image_2.pdf [file Image_2.pdf]

# Supplementary Figure 2

A.

| Epitopes                   | Positions     | Amino acid sequence  |
|----------------------------|---------------|----------------------|
| RBD9.1                     | 444-463 (RBD) | KVGGNYNYLYRLFRKSNLKP |
| S <sup>448-456</sup> (P45) | 448-456 (RBD) | NYNYLYRLF            |
| HBV Peptide                | 14-32 (S1)    | TNLSVPNPLGFFPDHQLDP  |

C.

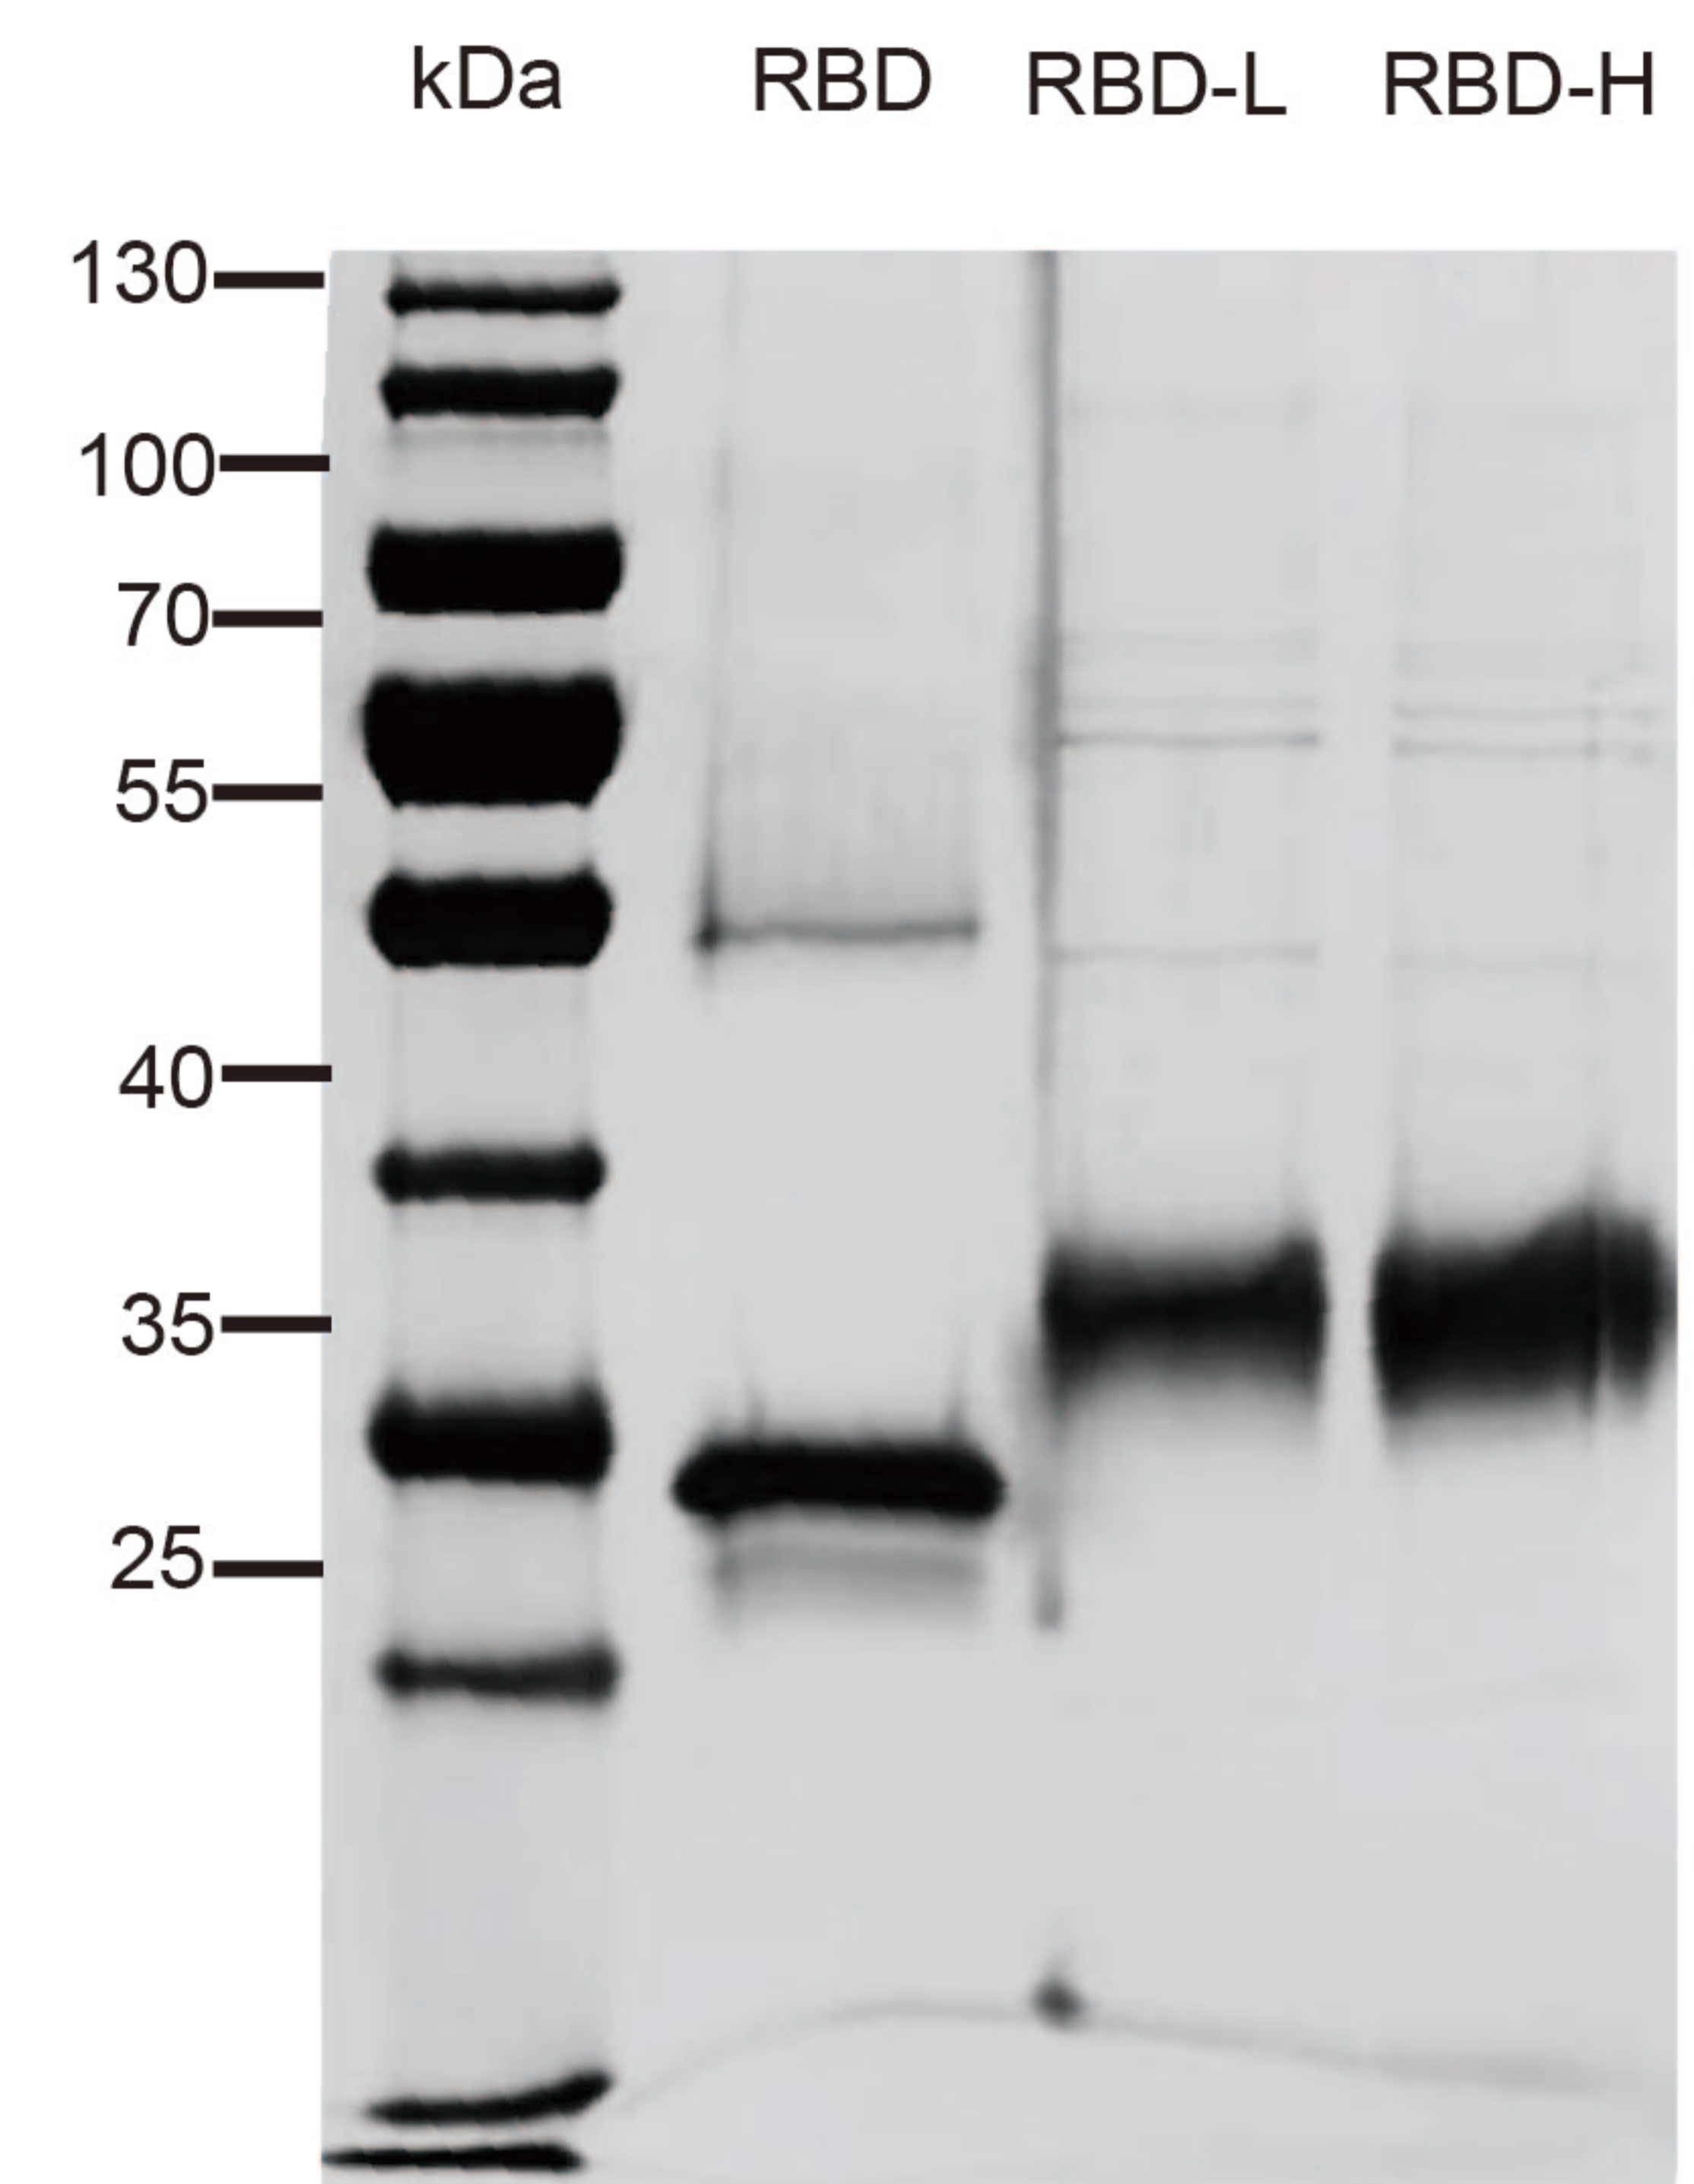

B.

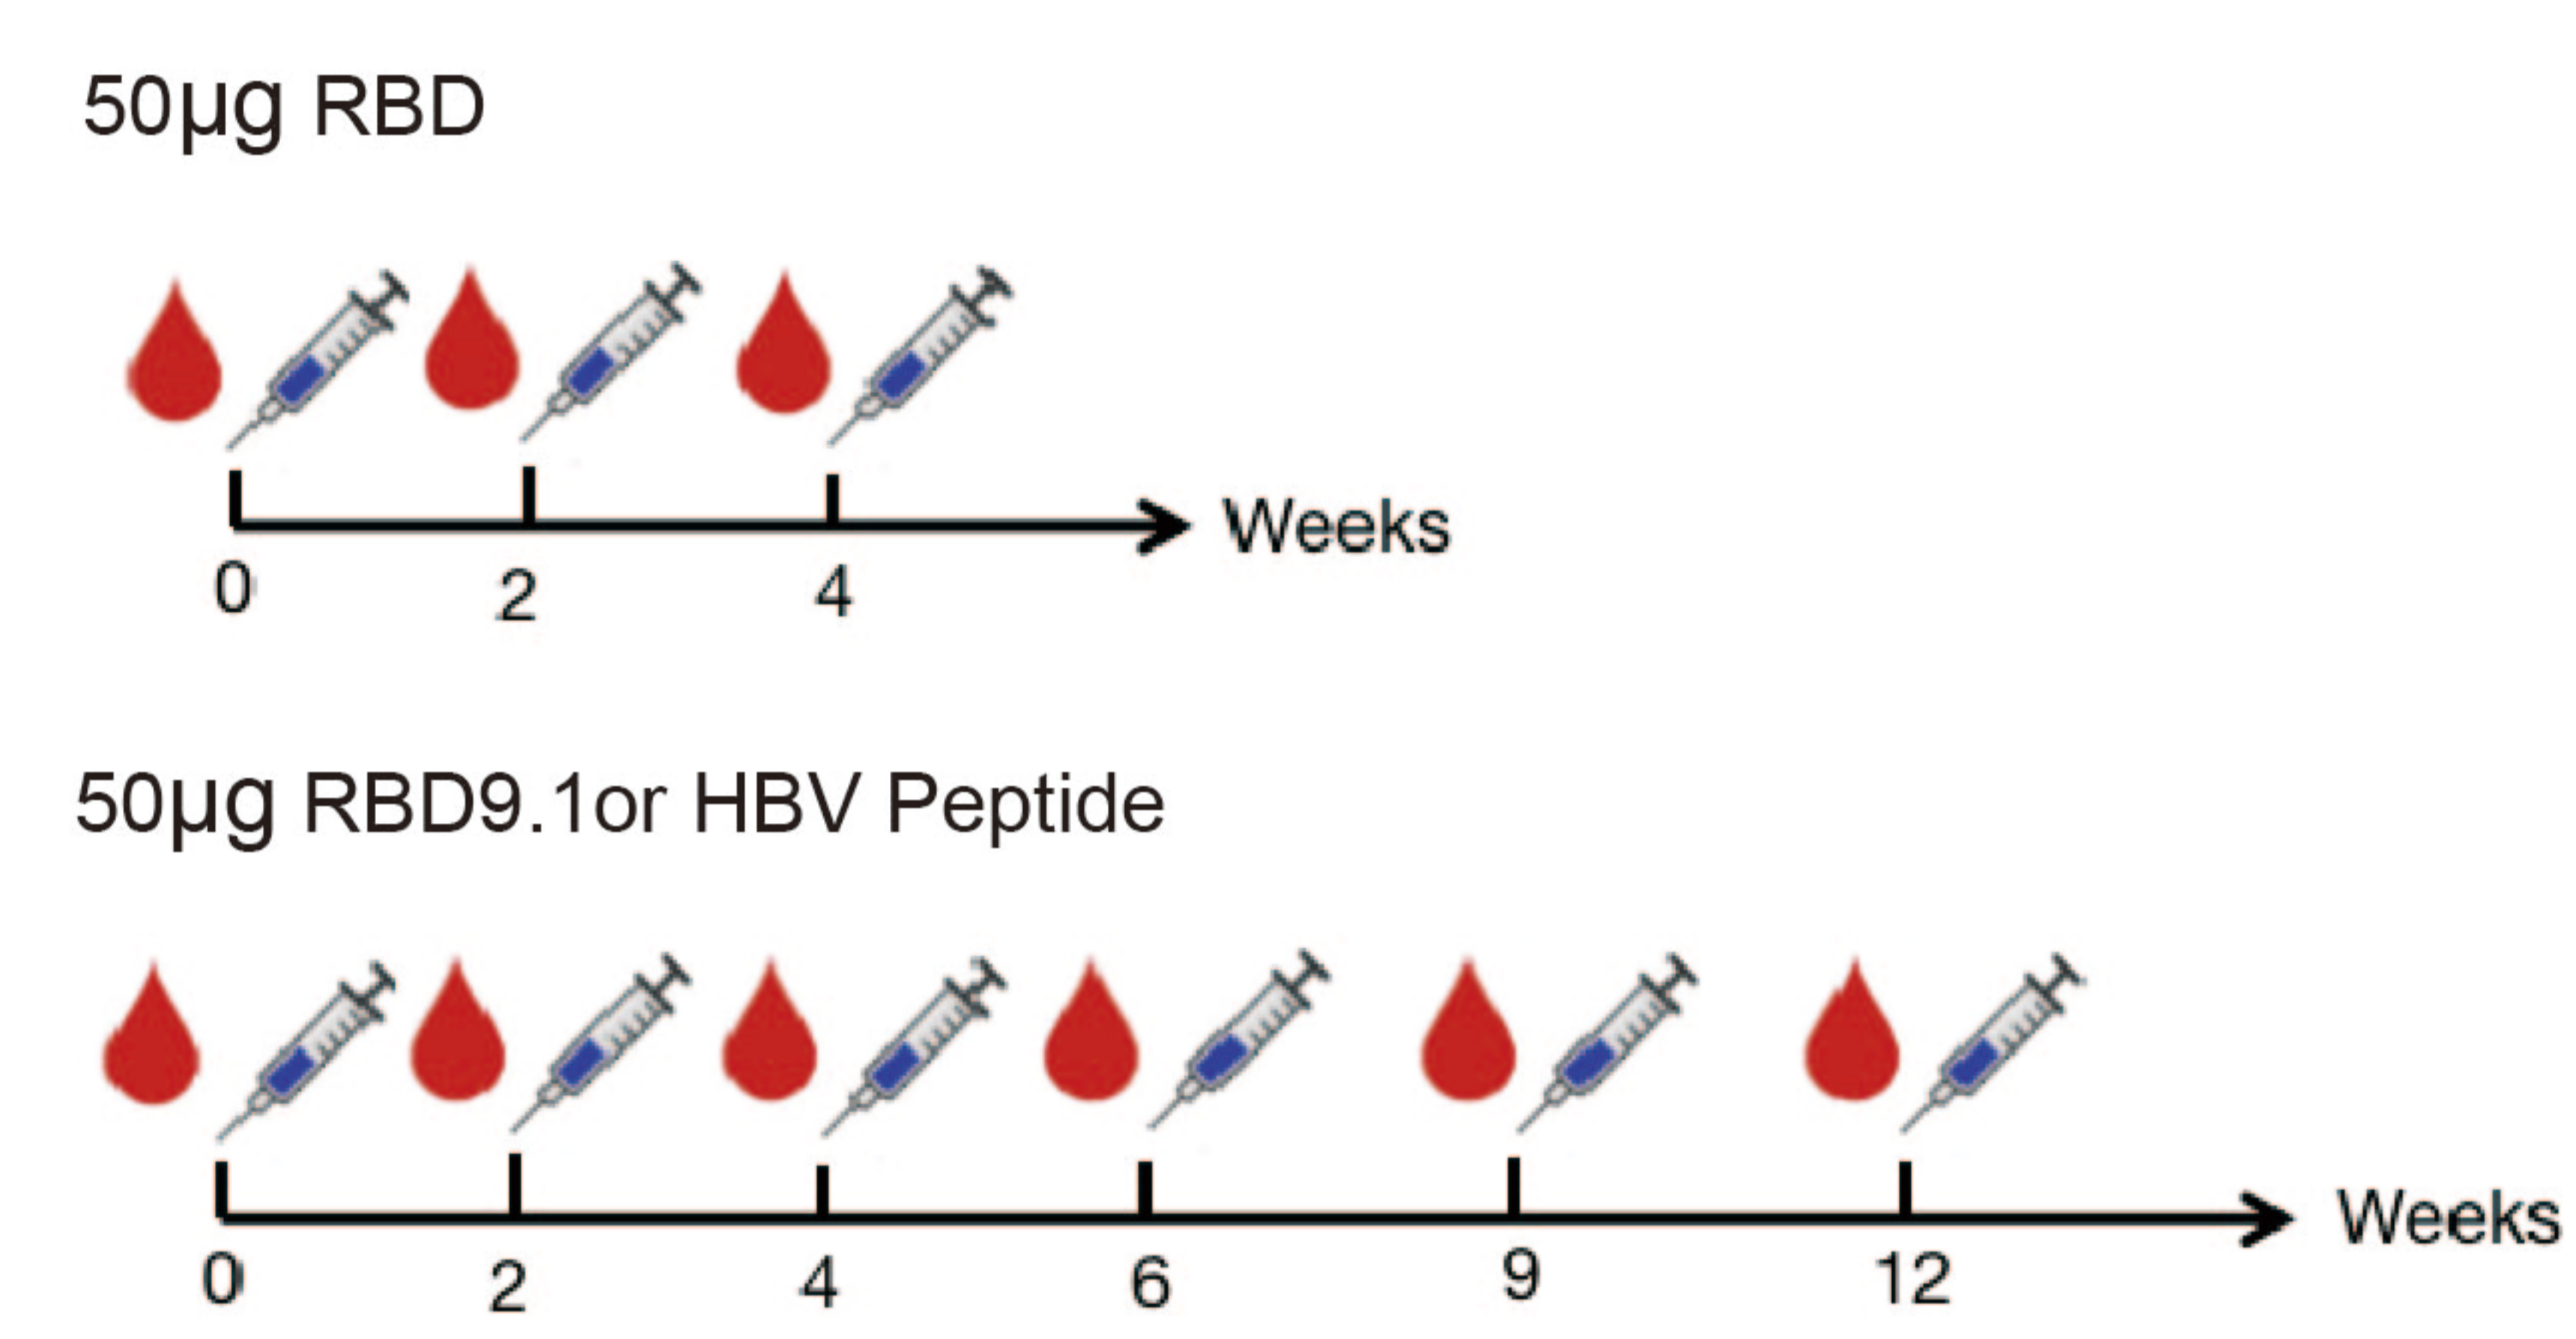

D.

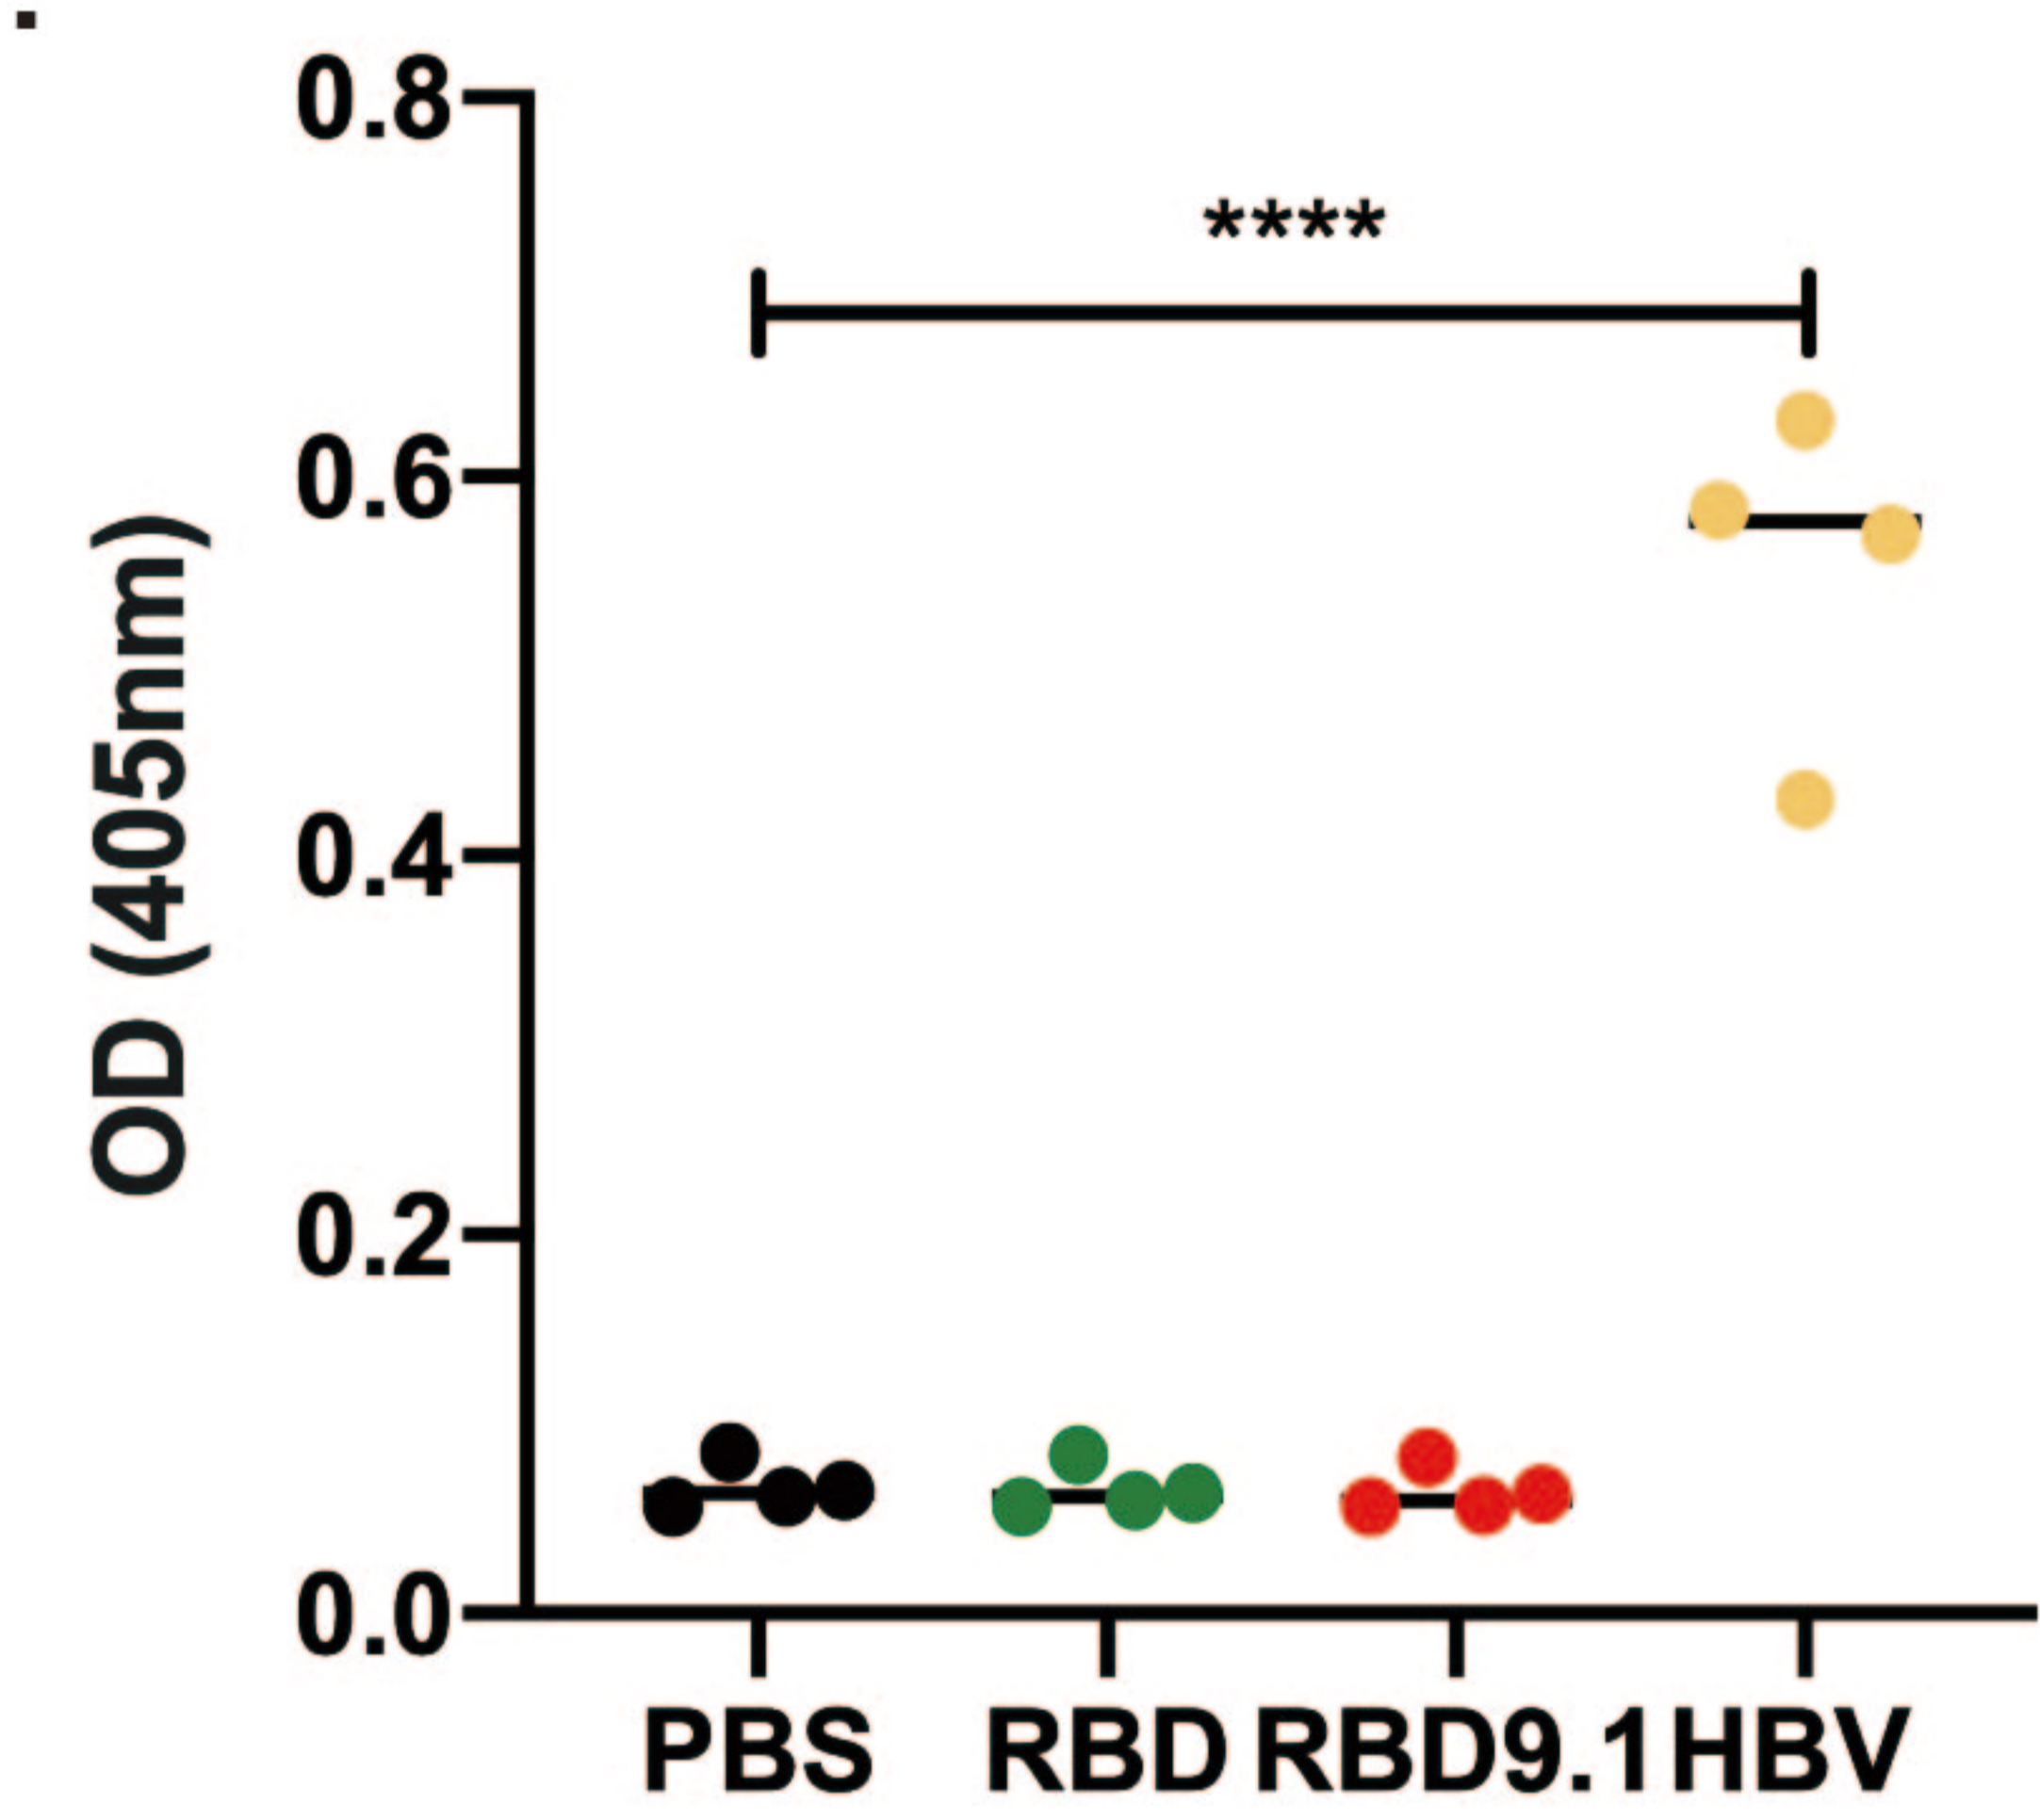

E.

|          |                         |
|----------|-------------------------|
| Wildtype | KVGGNYNYLYRLFRKSNLKP    |
| K444A    | AVGGNYNYLYRLFRKSNLKP    |
| V445A    | KAGGNYNLYRLFRKSNLKP     |
| G446A    | KVAGNYNYLYRLFRKSNLKP    |
| G447A    | KVGANYNLYRLFRKSNLKP     |
| N448A    | KVGGAYNYLYRLFRKSNLKP    |
| Y449A    | KVGGNANYLYRLFRKSNLKP    |
| N450A    | KVGGNYAYLYRLFRKSNLKP    |
| Y451A    | KVGGNYNALYRLFRKSNLKP    |
| L452A    | KVGGNYNYAYRLFRKSNLKP    |
| Y453A    | KVGGNYNYLARLFRKSNLKP    |
| R454A    | KVGGNYNYLYALFRKSNLKP    |
| L455A    | KVGGNYNYLYRAFRLFRKSNLKP |
| F456A    | KVGGNYNYLYRLARLFRKSNLKP |
| R457A    | KVGGNYNYLYRLFAKSNLKP    |
| K458A    | KVGGNYNYLYRLFRASNLKP    |
| S459A    | KVGGNYNYLYRLFRKANLKP    |
| N460A    | KVGGNYNYLYRLFRKSALKP    |
| L461A    | KVGGNYNYLYRLFRKSNLAKP   |
| K462A    | KVGGNYNYLYRLFRKSNLAP    |
| P463A    | KVGGNYNYLYRLFRKSNLKA    |

F.

|            |     |                                                     |                              |                                 |          |            |      |     |
|------------|-----|-----------------------------------------------------|------------------------------|---------------------------------|----------|------------|------|-----|
| SARS-CoV-2 | 387 | LNDLCFTNVYADSFVI                                    | RGDEVRQIAPGQTGKIADYNYKLPDDFT | GCV                             | I        | AWN        | 437  |     |
| SARS-CoV   | 374 | LNDLCFSNVYADSFVVKGDDVRQIAPGQTGVIADYNYKLPDDFMGCVLAWN |                              |                                 |          |            | 424  |     |
| SARS-CoV-2 | 438 | SNNLDSKVG                                           | GNYNLYRLFRKSN                | LKPFERDISTE                     | IYQAGST  | PCNGVEGFNC | 488  |     |
| SARS-CoV   | 425 | TRNI                                                | DATST                        | GNYNKYRYLRHGKLRPFERDISNVPFSPDGK | PCT      | P-P        | ALNC | 474 |
|            |     |                                                     |                              |                                 |          |            |      |     |
| SARS-CoV-2 | 489 | YF                                                  | PLQSYGFQPTNGV                | GYQP                            | YRVVLSFE |            | 516  |     |
| SARS-CoV   | 475 | YWPLNDYGFYTTT                                       | G                            | I                               | GYQP     | YRVVLSFE   | 502  |     |

G.

| SARS-COV-2 Strains | The sequence of RBD9.1 in SARS-COV-2 |
|--------------------|--------------------------------------|
| WT                 | KVGGNYNYLYRLFRKSNLKP                 |
| P.1                | KVGGNYNYLYRLFRKSNLKP                 |
| B.1.351            | KVGGNYNYLYRLFRKSNLKP                 |
| B.1.1.7            | KVGGNYNYLYRLFRKSNLKP                 |
| B.1.617.1          | KVGGNYNYRYRLFRKSNLKP                 |
| B.1.617.2          | KVGGNYNYRYRLFRKSNLKP                 |
