# Supplementary material for: A Highly Conserved Peptide Vaccine Candidate Activates Both Humoral and Cellular Immunity Against SARS-CoV-2 Variant Strains
Source: PubMed Central journal article supplement (PMC8688401; doi:10.3389/fimmu.2021.789905), 2021-12-07

# Supplementary Figure.4

A.

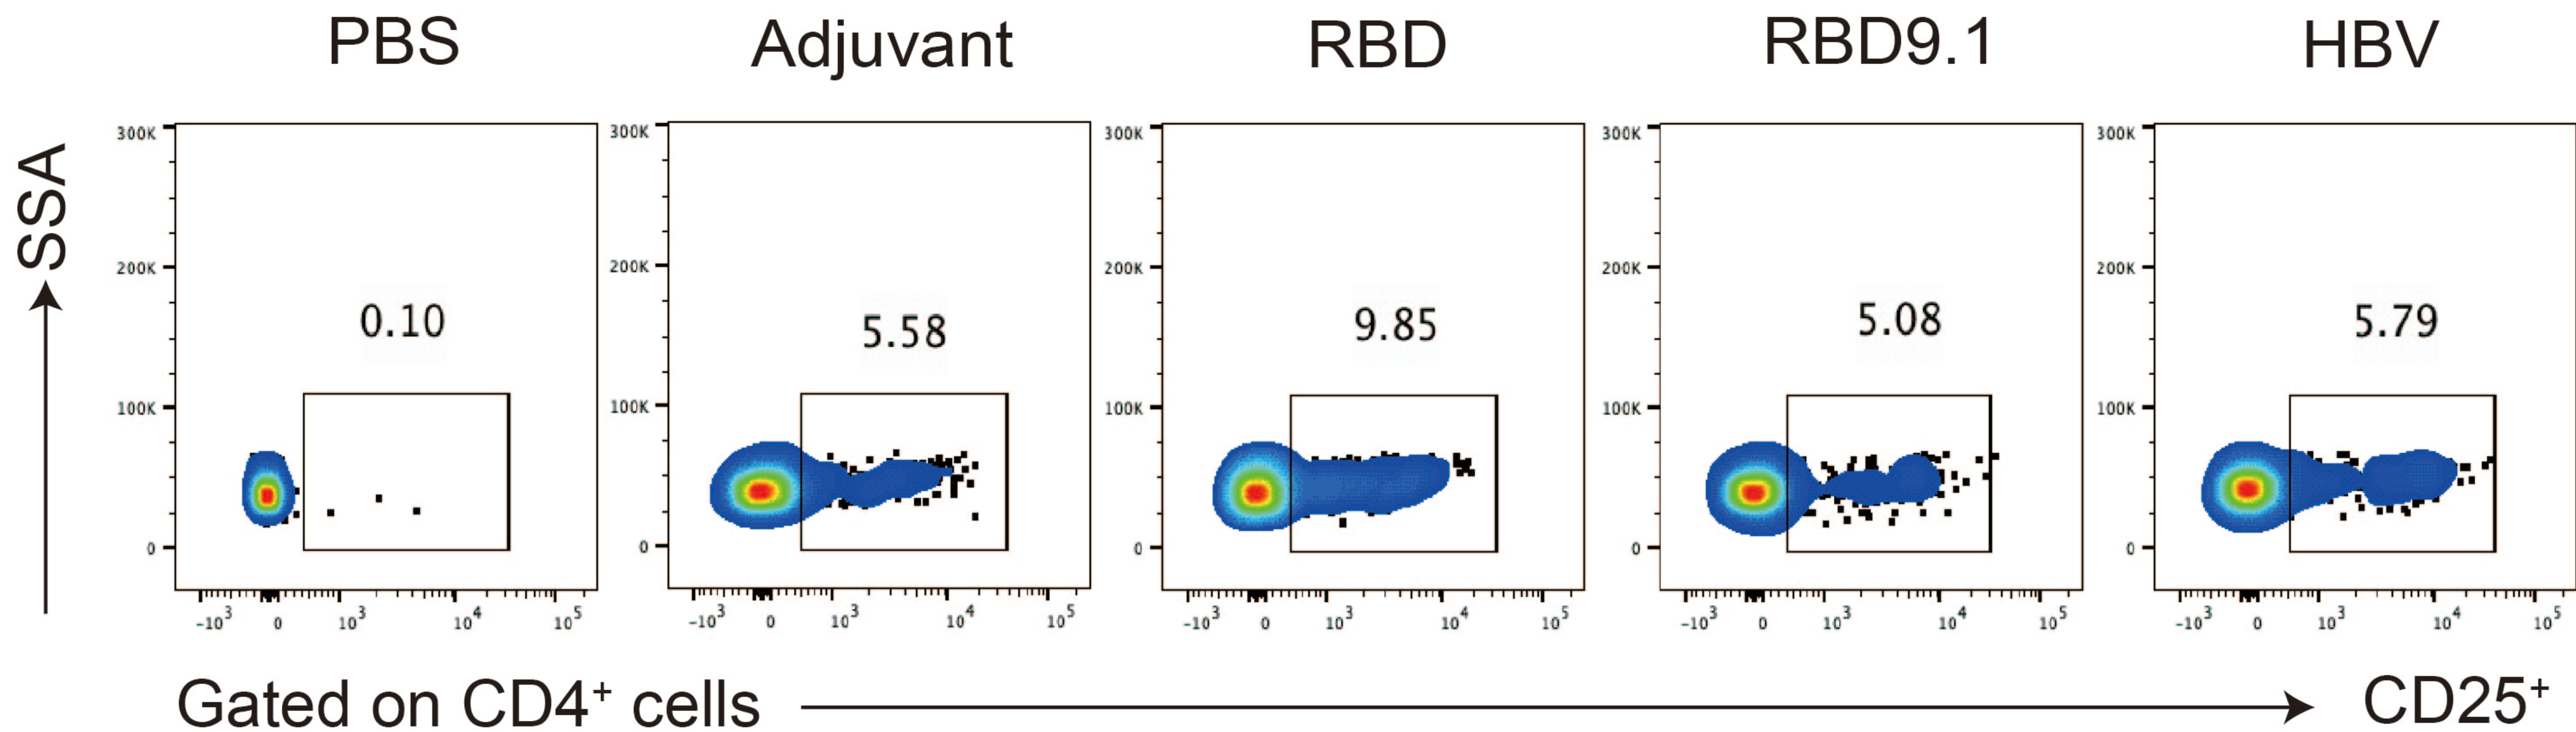

B.

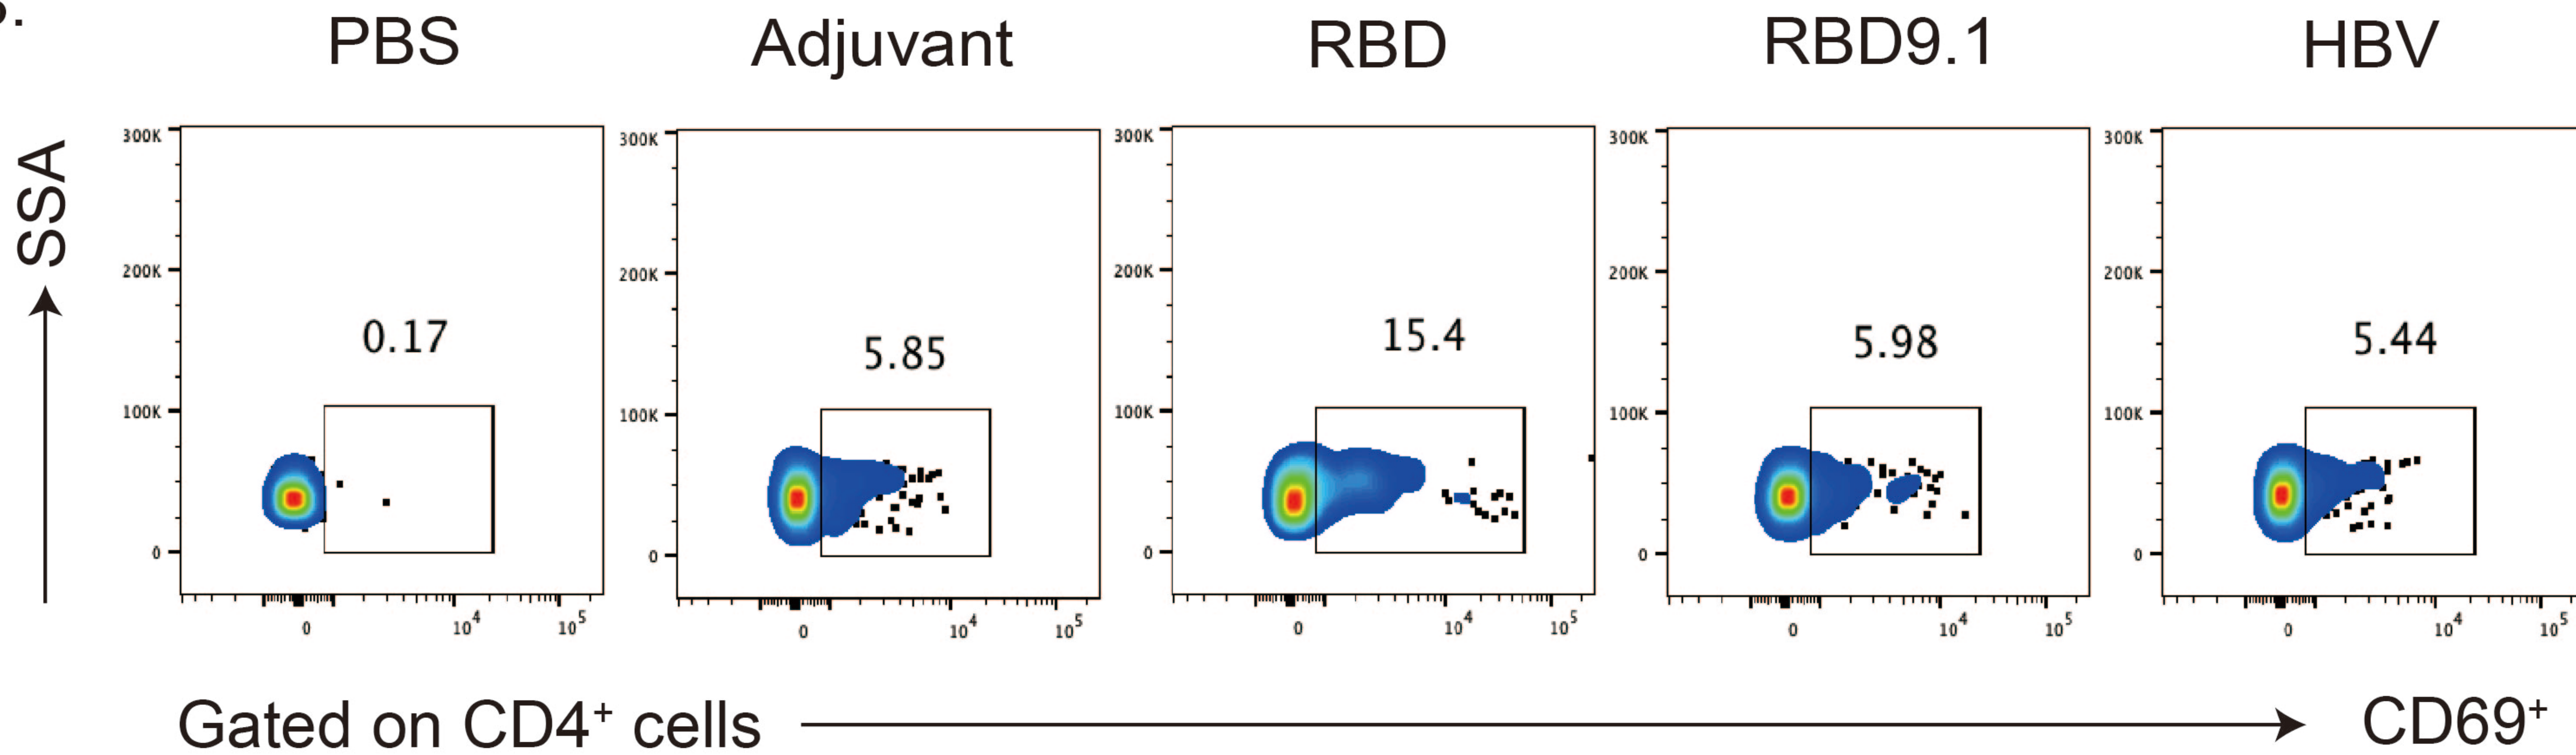

Supplement: Image_4.pdf [file Image_4.pdf]
