# Supplementary material for: A Highly Conserved Peptide Vaccine Candidate Activates Both Humoral and Cellular Immunity Against SARS-CoV-2 Variant Strains
Source: PubMed Central journal article supplement (PMC8688401; doi:10.3389/fimmu.2021.789905), 2021-12-07

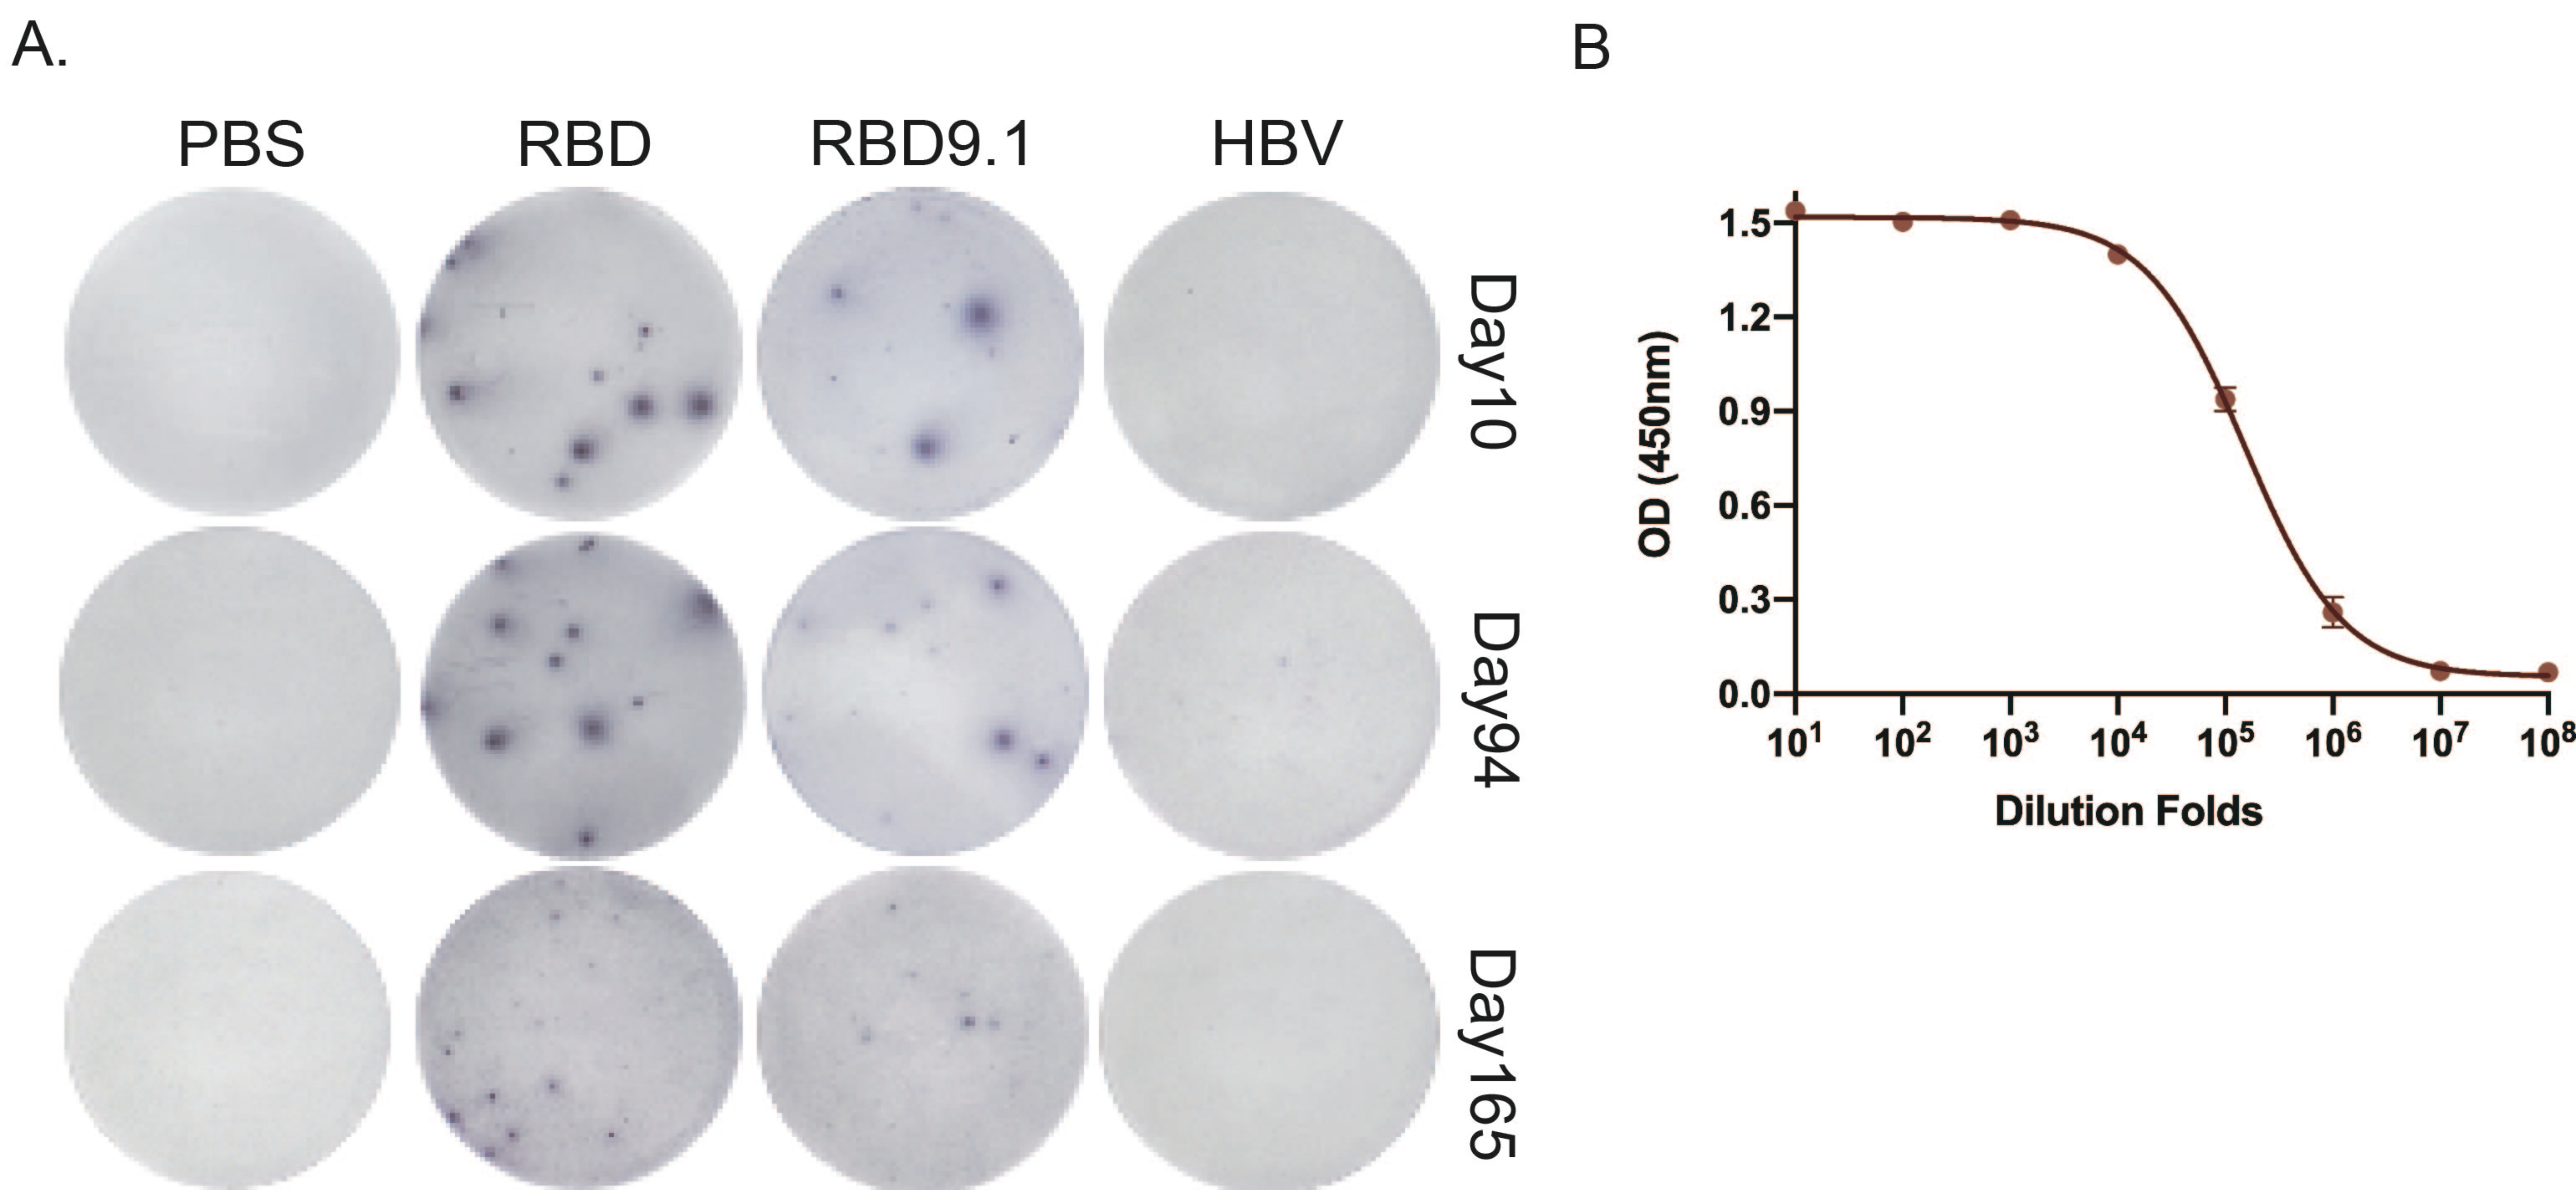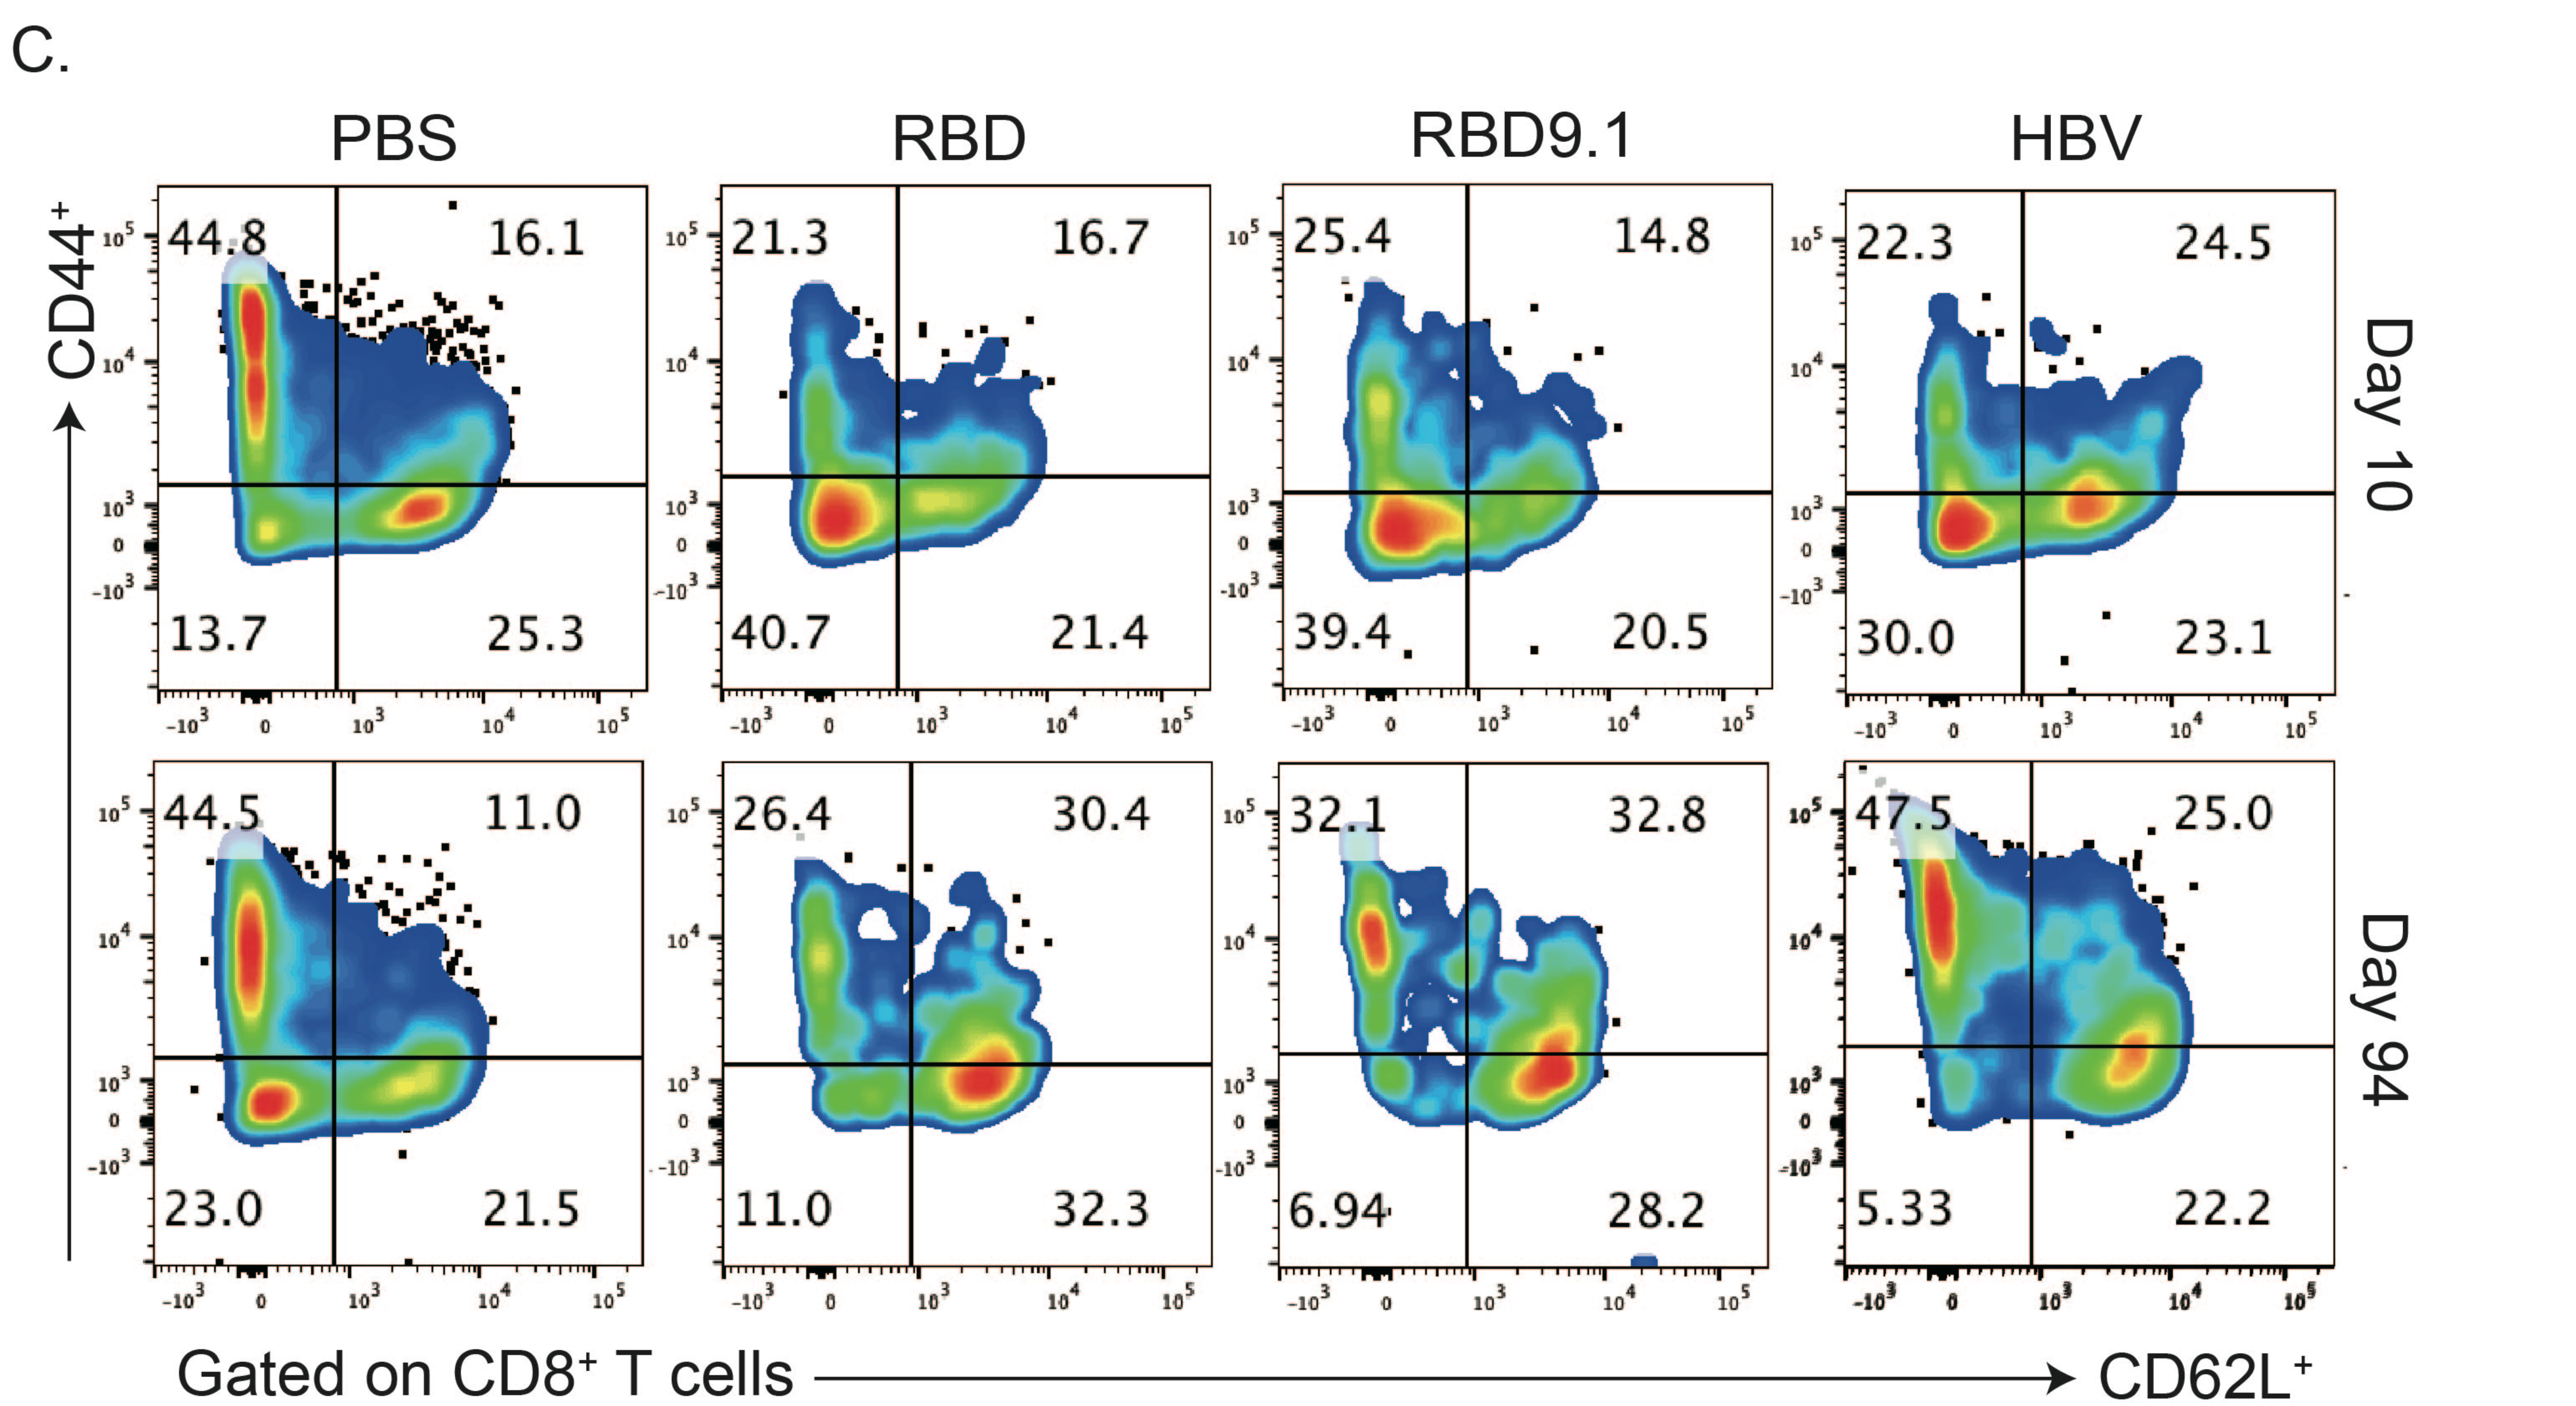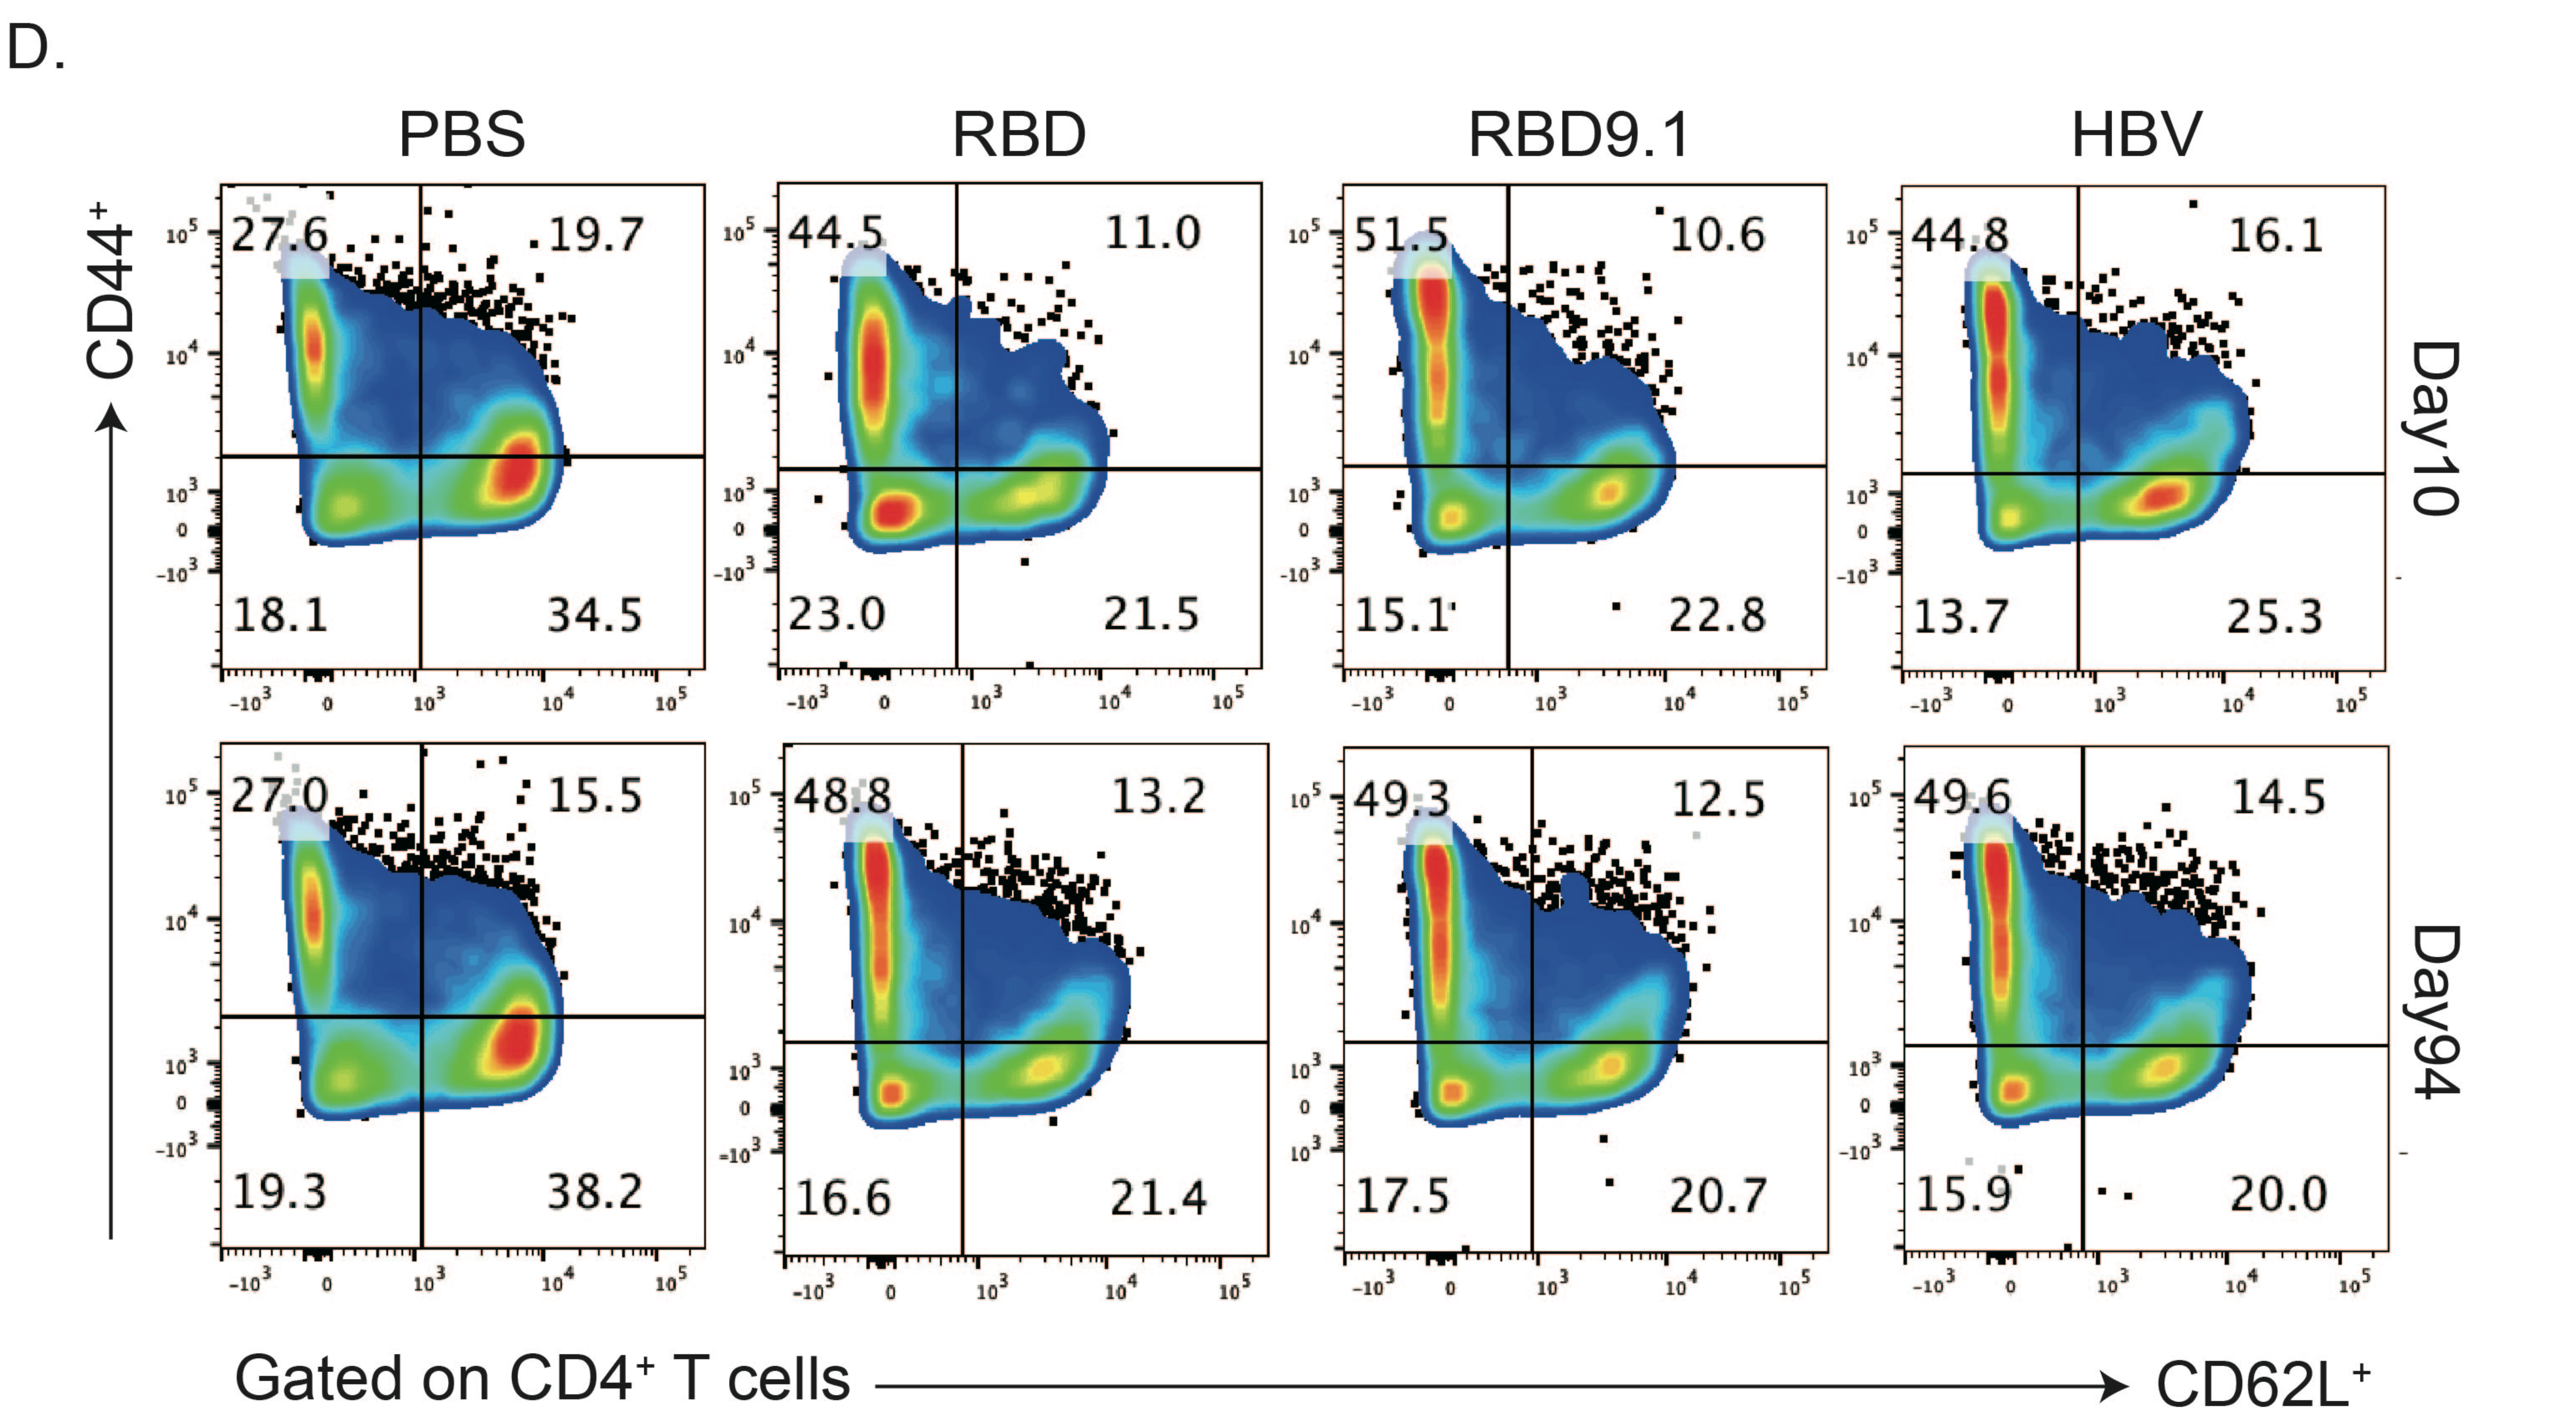

Supplement: Image_7.pdf [file Image_7.pdf]
