# Supplementary material for: A Highly Conserved Peptide Vaccine Candidate Activates Both Humoral and Cellular Immunity Against SARS-CoV-2 Variant Strains
Source: Front Immunol. 2021 Dec 7;12:789905. doi: 10.3389/fimmu.2021.789905 (PMC8688401; doi:10.3389/fimmu.2021.789905)
Supplement: Supplementary Table 2 — The clinical information and RBD-hACE2 interaction inhibition titers (IC50) and SARS-CoV-2 pseudovirus neutralization titers (IC50) were listed in Table 2 . [file Table_2.pdf]

Table.2

| Patient ID | Age(Years) | Gender(Male/Female) | Clinical classification<br>(mild:0, severe:1) | ACE2-Competitive<br>(IC <sub>50</sub> ) | PsV NAb(IC <sub>50</sub> ) |
|------------|------------|---------------------|-----------------------------------------------|-----------------------------------------|----------------------------|
| 1          | 56         | Female              | 0                                             | --                                      | --                         |
| 2          | 45         | Male                | 0                                             | --                                      | --                         |
| 3          | 44         | Male                | 0                                             | --                                      | --                         |
| 4          | 38         | Male                | 0                                             | --                                      | --                         |
| 5          | 40         | Female              | 0                                             | 27.69                                   | 1716                       |
| 6          | 50         | Male                | 0                                             | 43.14                                   | 3054                       |
| 7          | 56         | Female              | 0                                             | 233.5                                   | --                         |
| 8          | 51         | Female              | 0                                             | 138                                     | 1556                       |
| 9          | 48         | Male                | 1                                             | 54.71                                   | 1640                       |
| 10         | 32         | Male                | 0                                             | 37.47                                   | --                         |
| 11         | 54         | Male                | 0                                             | --                                      | --                         |
| 12         | 43         | Male                | 0                                             | 31.28                                   | --                         |
| 13         | 47         | Female              | 0                                             | 26.96                                   | 2034                       |
| 14         | 38         | Male                | 0                                             | --                                      | 199.2                      |
| 15         | 33         | Female              | 0                                             | --                                      | 3358                       |
| 16         | 44         | Male                | 0                                             | 34.3                                    | 6878                       |
| 17         | 60         | Female              | 0                                             | 81.85                                   | 1441                       |
| 18         | 48         | Female              | 0                                             | --                                      | --                         |
| 19         | 53         | Female              | 0                                             | 24.49                                   | 739.7                      |
| 20         | 57         | Male                | 0                                             | --                                      | --                         |
| 21         | 44         | Male                | 0                                             | 55.4                                    | 1101                       |
| 22         | 49         | Male                | 0                                             | 4.6                                     | --                         |
| 23         | 23         | Male                | 0                                             | --                                      | 4648                       |
| 24         | 44         | Female              | 0                                             | --                                      | 1311                       |
| 25         | 59         | Female              | 0                                             | 48.53                                   | 1619                       |
| 26         | 20         | Female              | 0                                             | --                                      | 1309                       |
| 27         | 37         | Male                | 0                                             | 32.2                                    | --                         |
| 28         | 44         | Female              | 0                                             | --                                      | 1556                       |
| 29         | 41         | Male                | 0                                             | 43.92                                   | --                         |
| 30         | 66         | Male                | 0                                             | 156.4                                   | --                         |
| 31         | 67         | Female              | 0                                             | 30.64                                   | --                         |
