# Supplementary material for: A Highly Conserved Peptide Vaccine Candidate Activates Both Humoral and Cellular Immunity Against SARS-CoV-2 Variant Strains
Source: PubMed Central journal article supplement (PMC8688401; doi:10.3389/fimmu.2021.789905), 2021-12-07
Supplement: Table_1.pdf [file Table_1.pdf]

|         | Patients ID | OD (405 nm) |
|---------|-------------|-------------|
| Group 1 | 1           | 1.248       |
|         | 9           | 1.506       |
|         | 11          | 1.699       |
|         | 12          | 1.678       |
|         | 13          | 1.612       |
|         | 14          | 1.719       |
|         | 15          | 1.613       |
|         | 17          | 1.18        |
|         | 18          | 1.731       |
|         | 19          | 1.708       |
|         | 20          | 1.569       |
|         | 21          | 1.788       |
|         | 24          | 1.642       |
|         | 25          | 1.278       |
|         | 26          | 1.019       |
|         | 27          | 1.246       |
|         | 28          | 1.541       |
|         | 29          | 1.455       |
| 31      | 0.915       |             |
| Group 2 | 2           | 2.186       |
|         | 3           | 2.093       |
|         | 4           | 1.91        |
|         | 5           | 2.236       |
|         | 6           | 2.262       |
|         | 7           | 2.385       |
|         | 8           | 2.098       |
|         | 10          | 1.921       |
|         | 16          | 1.989       |
|         | 22          | 2.183       |
|         | 23          | 2.247       |
|         | 30          | 2.023       |
