# Supplementary material for: A Highly Conserved Peptide Vaccine Candidate Activates Both Humoral and Cellular Immunity Against SARS-CoV-2 Variant Strains
Source: PubMed Central journal article supplement (PMC8688401; doi:10.3389/fimmu.2021.789905), 2021-12-07
Supplement: Table_3.pdf [file Table_3.pdf]

Table.3

| Groups      | Age (Weeks) | Gender (Male/Female) | Number | Mouse strain |
|-------------|-------------|----------------------|--------|--------------|
| PBS         | 6           | Female               | 10     | Balb/c       |
| Adjuvant    | 6           | Female               | 8      | Balb/c       |
| RBD         | 6           | Female               | 10     | Balb/c       |
| RBD9.1      | 6           | Female               | 10     | Balb/c       |
| HBV Peptide | 6           | Female               | 10     | Balb/c       |
