# Supplementary material for: A Highly Conserved Peptide Vaccine Candidate Activates Both Humoral and Cellular Immunity Against SARS-CoV-2 Variant Strains
Source: PubMed Central journal article supplement (PMC8688401; doi:10.3389/fimmu.2021.789905), 2021-12-07
Supplement: Table_4.pdf [file Table_4.pdf]

Table.4

| SARS-CoV-2 Strains | The sequence of RBD9.1 peptide |
|--------------------|--------------------------------|
| WT                 | KVGGNYNYLYRLFRKSNLKP           |
| P.1                | KVGGNYNYLYRLFRKSNLKP           |
| B.1.351            | KVGGNYNYLYRLFRKSNLKP           |
| B.1.1.7            | KVGGNYNYLYRLFRKSNLKP           |
| B.1.617.1          | KVGGNYNYRYRLFRKSNLKP           |
| B.1.617.2          | KVGGNYNYRYRLFRKSNLKP           |
